## CORRECTION

# Correction: The role of AKT and FOXO3 in preventing ovarian toxicity induced by cyclophosphamide

Bao-fang Zhang, YaXin Hu, Xinyan Liu, Zhuo Cheng, Yu Lei, YongMei Liu, Xueke Zhao, Mao Mu, Lei Yu, Ming-liang Cheng

There is an error in affiliation 1 for author Bao-fang Zhang. The correct affiliation 1 is: The Second Affiliated Hospital, Soochow University, Suzhou, Jiangsu, China.

## Reference

1. Zhang B-f, Hu Y, Liu X, Cheng Z, Lei Y, Liu Y, et al. (2018) The role of AKT and FOXO3 in preventing ovarian toxicity induced by cyclophosphamide. PLoS ONE 13(8): e0201136. <https://doi.org/10.1371/journal.pone.0201136> PMID: 30071053

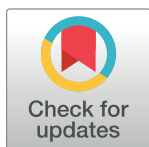

## OPEN ACCESS

**Citation:** Zhang B-f, Hu Y, Liu X, Cheng Z, Lei Y, Liu Y, et al. (2019) Correction: The role of AKT and FOXO3 in preventing ovarian toxicity induced by cyclophosphamide. PLoS ONE 14(4): e0215616. <https://doi.org/10.1371/journal.pone.0215616>

**Published:** April 15, 2019

**Copyright:** © 2019 Zhang et al. This is an open access article distributed under the terms of the [Creative Commons Attribution License](https://creativecommons.org/licenses/by/4.0/), which permits unrestricted use, distribution, and reproduction in any medium, provided the original author and source are credited.
